# Supplementary material for: Pharmacological ascorbate inhibits pancreatic cancer metastases via a peroxide-mediated mechanism
Source: PubMed Central journal article supplement (PMC7572461; doi:10.1038/s41598-020-74806-2), 2020-10-19
Supplement: 41598_2020_74806_MOESM1_ESM.pdf [file 41598_2020_74806_MOESM1_ESM.pdf]

***SUPPLEMENTARY MATERIALS FOR:***

**PHARMACOLOGICAL ASCORBATE INHIBITS PANCREATIC CANCER  
METASTASES VIA A PEROXIDE-MEDIATED MECHANISM**

Brienne R. O'Leary<sup>1</sup>

Matthew S. Alexander<sup>1</sup>

Juan Du<sup>1</sup>

Devon L. Moose<sup>2</sup>

Michael D. Henry<sup>2,3,4,5,6</sup>

Joseph J. Cullen<sup>1,3,6</sup>

Department of Surgery<sup>1</sup>, Department of Molecular Physiology and Biophysics<sup>2</sup>, The Holden Comprehensive Cancer Center, University of Iowa Hospitals and Clinics<sup>3</sup>, Department of Pathology<sup>4</sup>, Department of Urology<sup>5</sup>, Free Radical and Radiation Biology Program, Department of Radiation Oncology<sup>6</sup>, The University of Iowa Carver College of Medicine, Iowa City, Iowa, USA.

\* Correspondence Author

Joseph J. Cullen, M.D.,

1528 JCP, 200 Hawkins Drive, University of Iowa Hospitals and Clinics, Iowa City, IA 52242.

joseph-cullen@uiowa.edu W: (319) 353-8297, Fax: (319) 356-8378.

**A**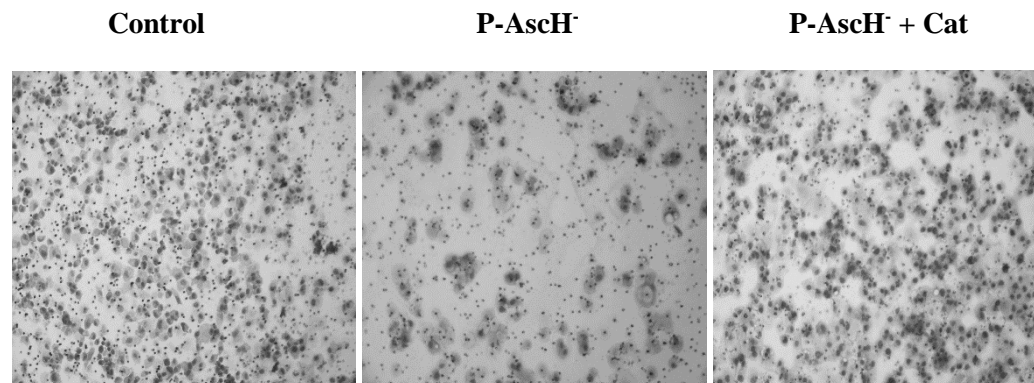**B**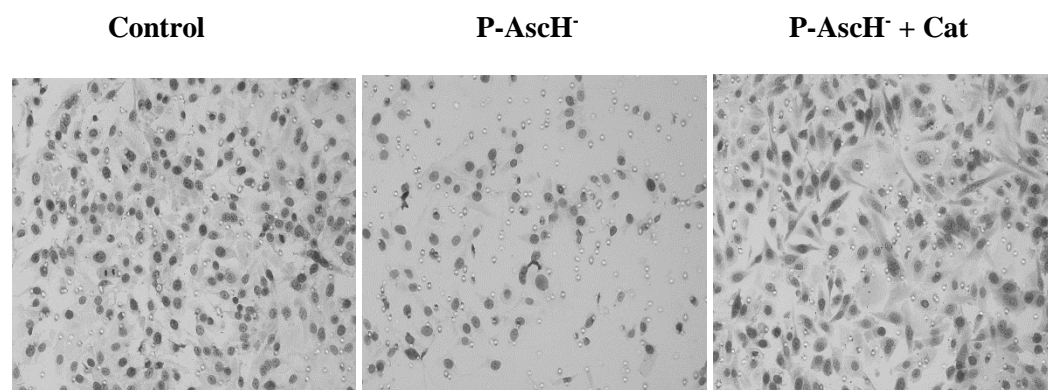**Supplemental Figure 1. P-AscH<sup>-</sup> attenuates the invasive phenotype of PDAC *in vitro*.**

**A & B.** Representative invasion images from Panc-1 (A) and 339 (B) PDAC cells in the presence of P-AscH<sup>-</sup> (4mM) and/or catalase (200 U/mL). Cells were treated for 1 h then seeded at  $1-3 \times 10^5$  and incubated for 24 (PANC-1) or 48 h (339).

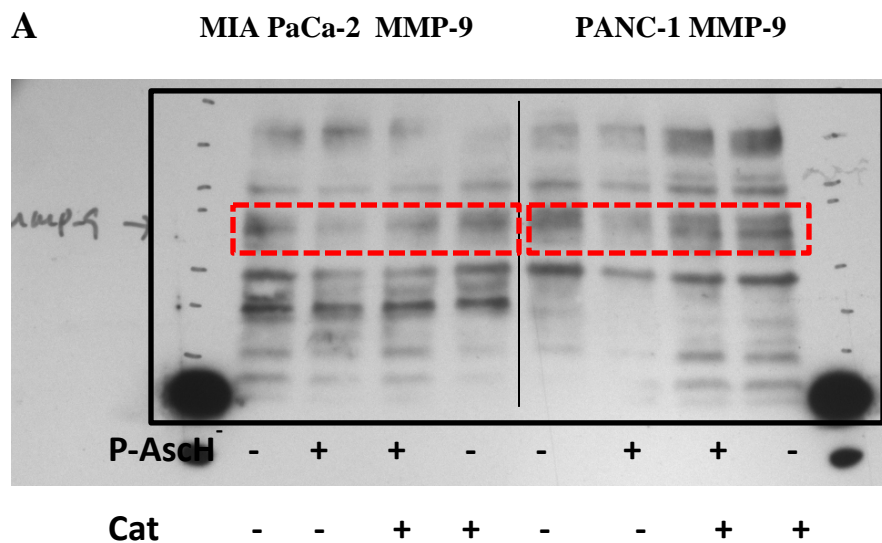

**B** MIA PaCa-2 GAPDH

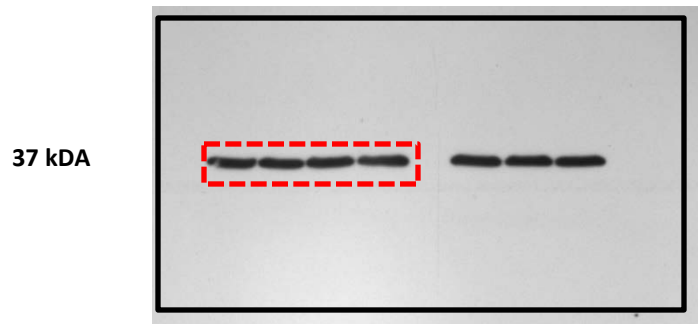

**C** PANC-1 GAPDH

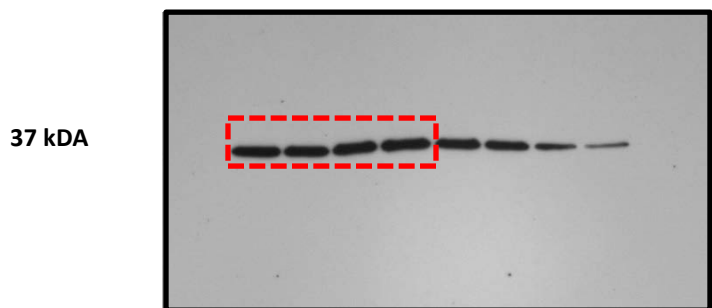

**Supplementary Figure 2.** Original unprocessed Western blots from main Figure 2C. **A.** MMP-9 expression from MIA PaCa-2 and PANC-1 cells following treatment with ascorbate +/- catalase. **B.** Corresponding GAPDH loading control from MIA PaCa-2 cells. **C.** Corresponding GAPDH loading control from PANC-1 cells.

**D**

339 MMP-2

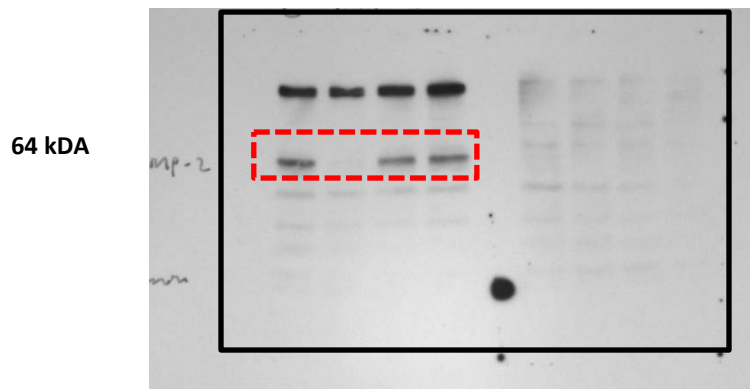

|        |   |   |   |   |
|--------|---|---|---|---|
| P-Asch | - | + | + | - |
| Cat    | - | - | + | + |

**E**

PANC-1 MMP-2

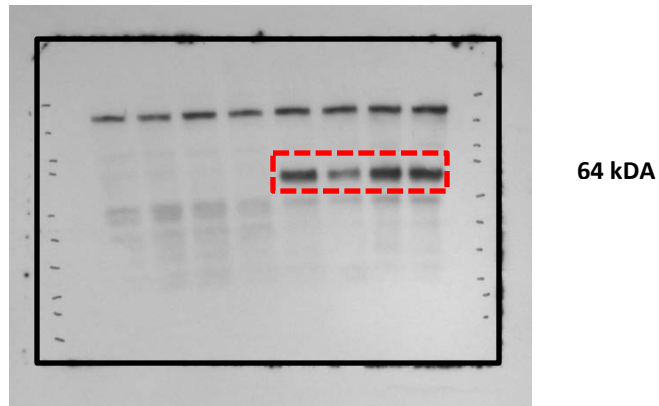

|        |   |   |   |   |
|--------|---|---|---|---|
| P-Asch | - | + | + | - |
| Cat    | - | - | + | + |

**F**

339 GAPDH

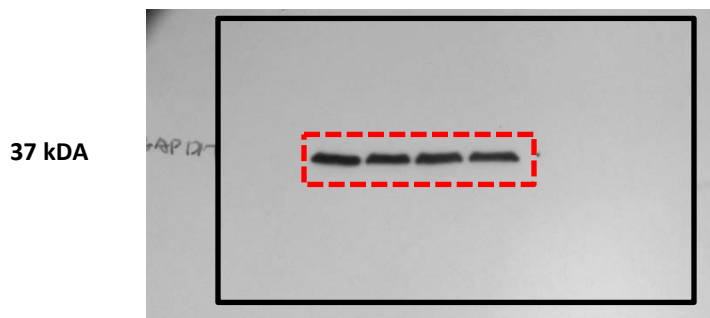**G**

PANC-1 GAPDH

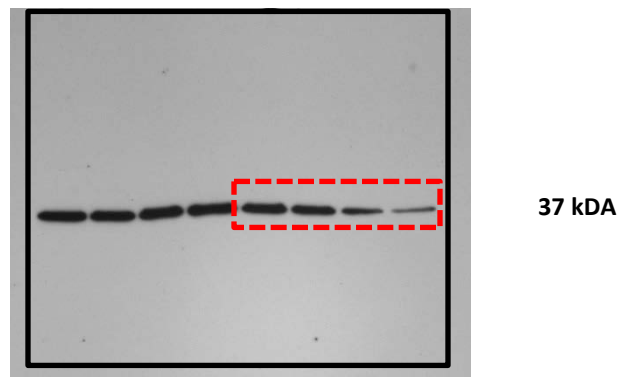

**Supplementary Figure 2 Continued.** Original unprocessed Western blots from main Figure 2D. **D & E.** MMP-2 expression from 339 and PANC-1 cells following treatment with ascorbate +/- catalase. **F.** Corresponding GAPDH loading control from 339 cells. **G.** Corresponding GAPDH loading control from PANC-1 cells.

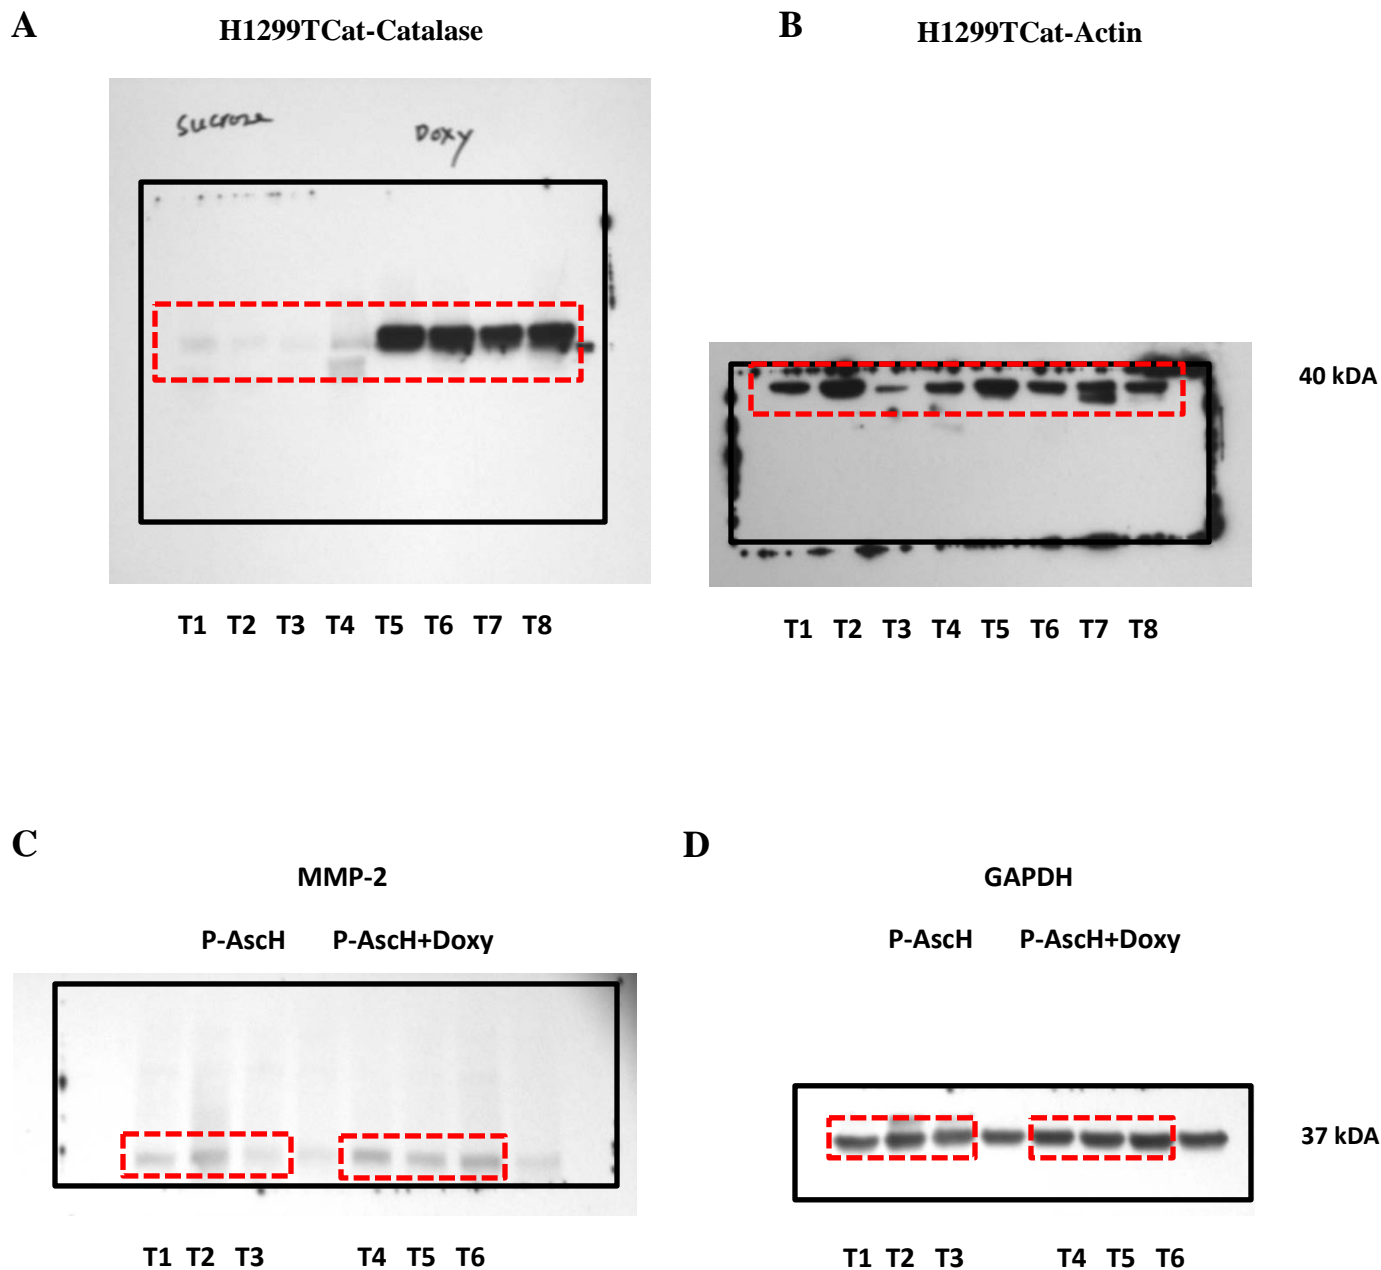

**Supplementary Figure 3.** Original unprocessed Western blots from main Figures 4H&I. **A.** Catalase immunoreactive protein is increased in tumors from mice treated with P-AscH<sup>-</sup> + doxycycline. **B.** Corresponding Actin loading control from mouse tumors. **C.** MMP-2 immunoreactive protein is decreased in mice treated with P-AscH<sup>-</sup> compared to mice treated with P-AscH<sup>-</sup> + doxycycline. **D.** Corresponding GAPDH loading control from mouse tumors.

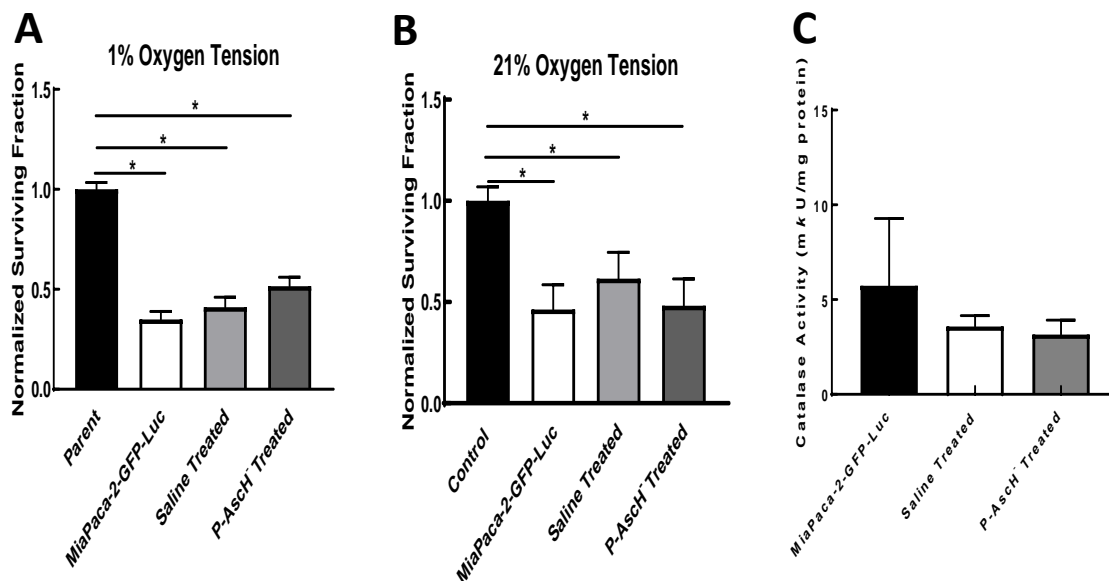

**Supplemental Figure 4. No changes in P-Asch<sup>-</sup> toxicity or catalase activity in metastatic disease.**

**A** and **B**. Liver specimens with visible metastatic lesions were used to isolate single tumor cells from both saline treated and P-Asch<sup>-</sup> treated mice. Cells were cultured at both 1% and 21% oxygen tension following confirmation of both GFP and luciferase expression after isolation. The stably expressing cell line (MIA PaCa-2-GFP-Luc) and isolated tumor cells from both saline treated and P-Asch<sup>-</sup> treated mice were incubated with 1 mM for 1 h and assessed for clonogenic cell survival. Colony formation was determined after 7-10 days. No differences were detected in clonogenic survival between the stably expressing cell line, saline treated, and P-Asch<sup>-</sup> treated isolated cells compared to the parental cell line. Surviving fraction was decreased with the addition of P-Asch<sup>-</sup> in the stably expressing cell line and isolated tumor cell lines compared to controls. Data represent normalized surviving fractions compared to controls  $\pm$  SE (n = 3, \* p < 0.05; one-way ANOVA with Bonferroni's multiple comparisons).

**C**. Isolated tumor cells from saline treated and P-Asch<sup>-</sup> treated mice were tested for catalase activity and compared to MIA PaCa-2-GFP-Luc cells. No differences were detected in catalase activity between stable expressing cells and saline or P-Asch<sup>-</sup> treated tumor cells. Data represent catalase activity in mK U/mg protein  $\pm$  SE (n = 3, p > 0.05; one-way ANOVA with Bonferroni's multiple comparisons).
